# Supplementary material for: Hydrogen evolution reaction activity related to the facet-dependent electrocatalytic performance of NiCoP from first principles
Source: Royal Society of Chemistry journal article supplement (doi:10.1039/c9ra01560d), 2019-01-01
Supplement: c9ra01560d1.pdf [file c9ra01560d1.pdf]

## Support Information

### **Hydrogen evolution reaction activity for facet-dependent electrocatalytic performance of NiCoP from first principles**

Jie Mou<sup>a,b</sup>, Yuyue Gao<sup>a,b</sup>, Jingbo Wang<sup>b</sup>, Jianyi Ma<sup>a</sup> and Haisheng Ren<sup>\*b</sup>

*<sup>a</sup>Institute of Atomic and Molecular Physics, Sichuan University, Chengdu, 610065, P. R. China*

*<sup>b</sup>School of Chemical Engineering, Sichuan University, Chengdu, 610065, P. R. China*

**Table S1.** The vibrational frequencies of the facets with hydrogen adsorption (unit in  $\text{cm}^{-1}$ )

| Surface type | $\nu_1$ | $\nu_2$ | $\nu_3$ |
|--------------|---------|---------|---------|
| (111)        | 1218    | 942     | 573     |
| (100)        | 1281    | 933     | 600     |
| (001)-NiP-t  | 1056    | 722     | 715     |
| (001)-CoP-t  | 1138    | 768     | 764     |

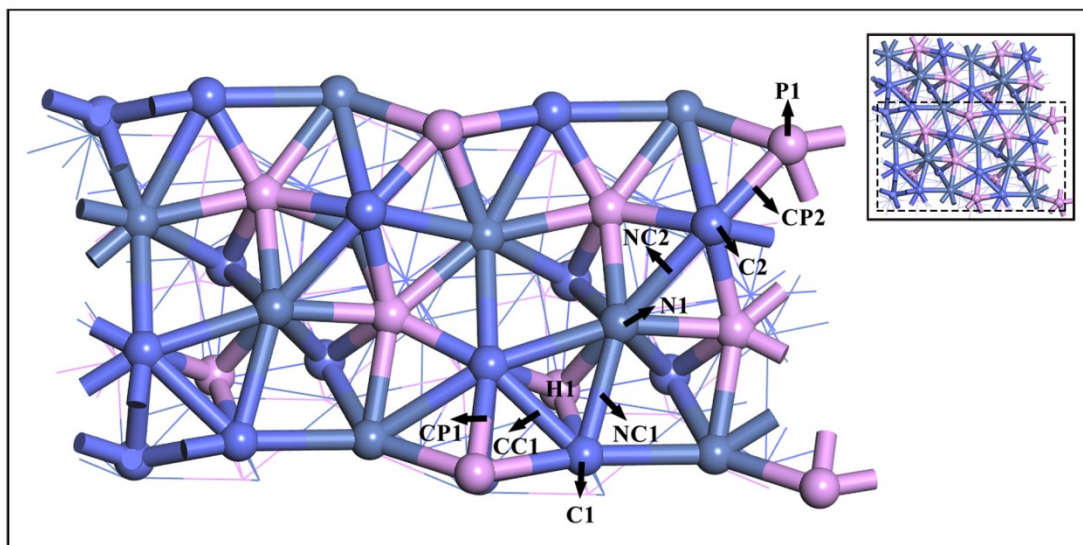

**Figure S1.** All possible adsorption sites on (111) facet. Note that the color of gray, blue and pink stand for Ni, Co and P atoms, respectively.

**Table S2.** Adsorption energy of the optimized hydrogen adsorption sites for (111) facet (unit in eV).

| Adsorption sites | CP1        | C1         | CC1        | NC1        | H1    | N1         | NC2   | C1         | CP2         | P1   |
|------------------|------------|------------|------------|------------|-------|------------|-------|------------|-------------|------|
| (111) facet      | move to H1 | move to H1 | move to H1 | move to H1 | -0.76 | move to H1 | -0.46 | move to H1 | move to NC2 | 0.43 |

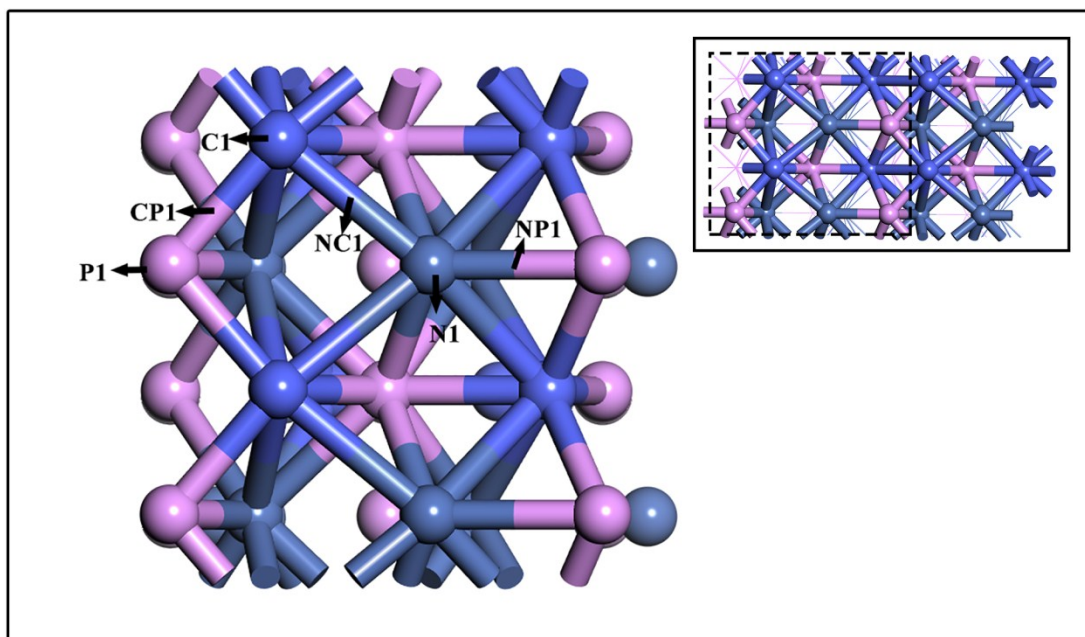

**Figure S2.** All possible adsorption sites on (100) facet. Note that the color of gray, blue and pink stand for Ni, Co and P atoms, respectively.

**Table S3.** Adsorption energy of the optimized hydrogen adsorption sites for (100) facet (unit in eV).

| Adsorption sites | P1   | CP1        | C1         | NC1        | N1    | NP1  |
|------------------|------|------------|------------|------------|-------|------|
| (100) facet      | 0.24 | move to N1 | move to N1 | move to N1 | -0.72 | 0.27 |

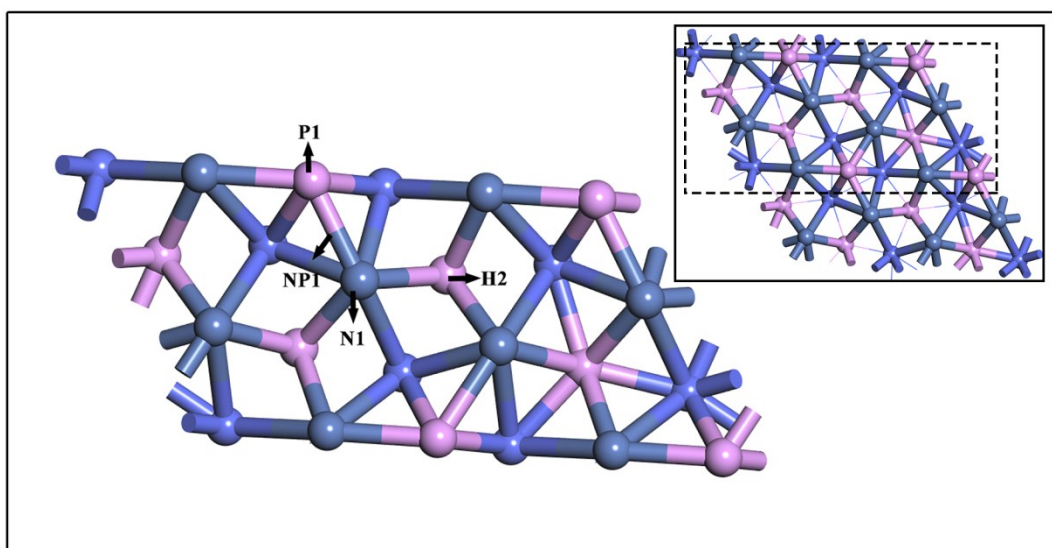

**Figure S3.** All possible adsorption sites on (001)-NiP-t facet. Note that the color of gray, blue and pink stand for Ni, Co and P atoms, respectively.

**Table S4.** Adsorption energy of the optimized hydrogen adsorption sites for (001)-NiP-t facet (unit in eV).

| Adsorption sites  | P1         | PN1        | N1         | H2    |
|-------------------|------------|------------|------------|-------|
| (001)-NiP-t facet | move to H2 | move to H2 | move to H2 | -0.42 |



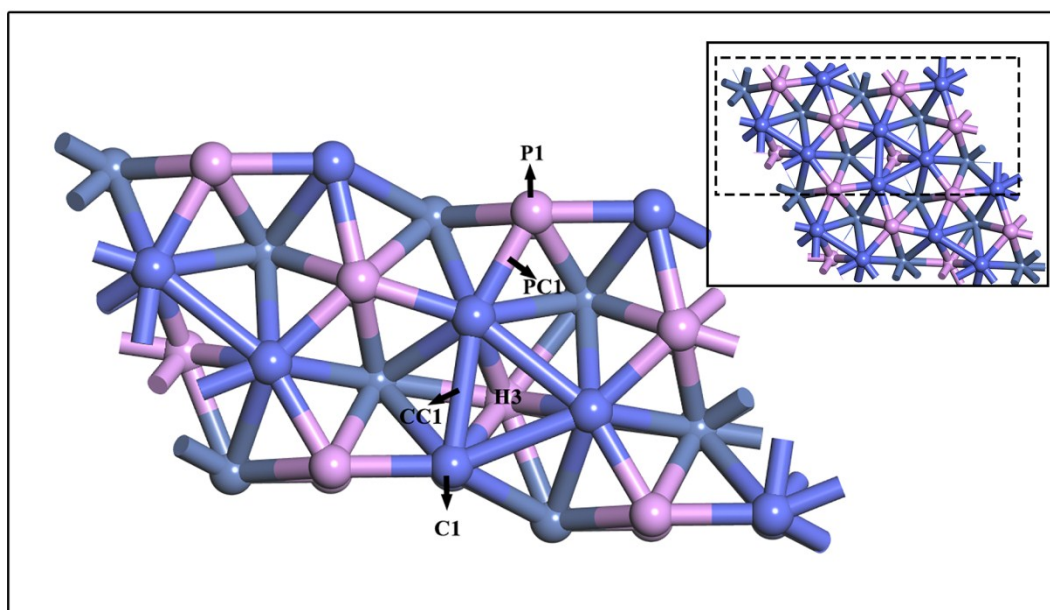

**Figure S4.** All possible adsorption sites on (001)-CoP-t facet. Note that the color of gray, blue and pink stand for Ni, Co and P atoms, respectively.

**Table S5.** Adsorption energy of the optimized hydrogen adsorption sites for (001)-CoP-t facet (unit in eV).

| Adsorption sites  | P1         | C1         | PC1        | CC1        | H3    |
|-------------------|------------|------------|------------|------------|-------|
| (001)-CoP-t facet | move to H3 | move to H3 | move to H3 | move to H3 | -0.80 |

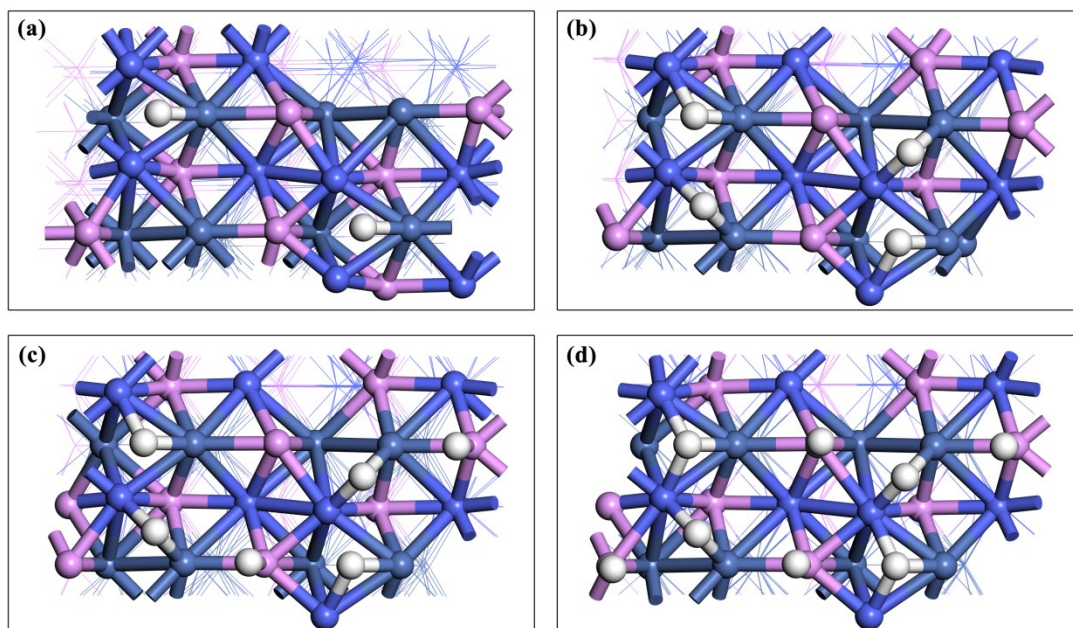

**Figure S5.** Optimized structures of (100) facet at typical hydrogen coverage: (a) 25%, (b) 50%, (c) 75% and (d) 100%. Note that the color of gray, blue, pink and white stand for Ni, Co, P and H atoms, respectively.

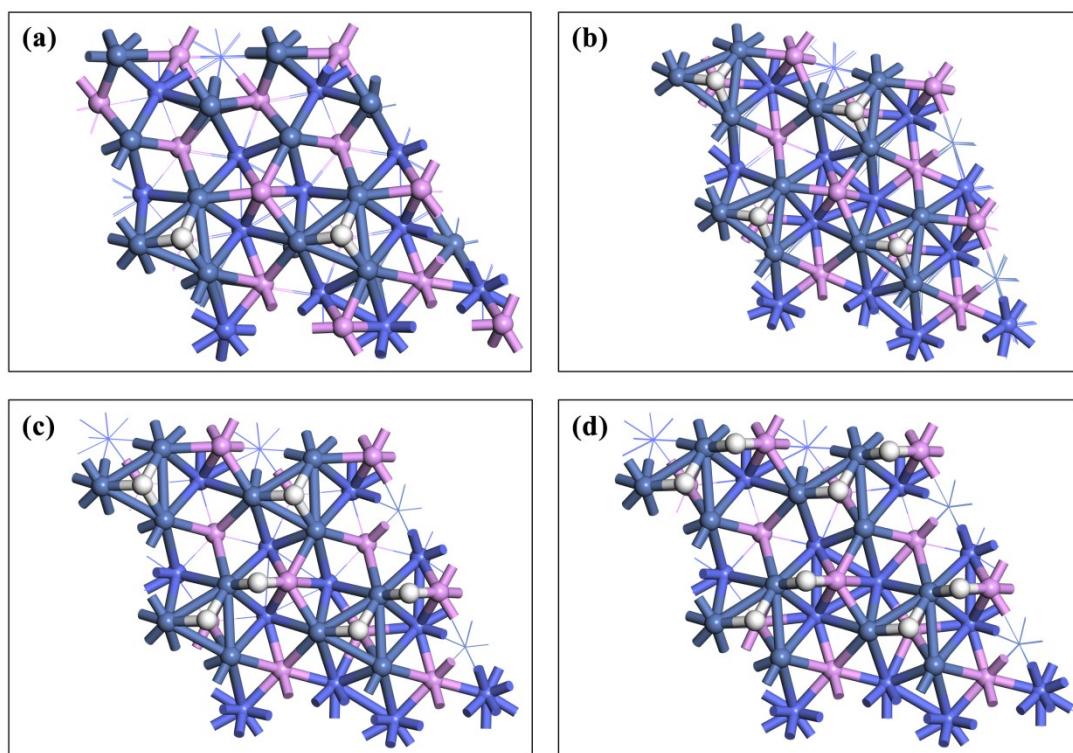

**Figure S6.** Optimized structures of (001)-NiP-t facet at typical hydrogen coverage: (a) 25%, (b) 50%, (c) 75% and (d) 100%. Note that the color of gray, blue, pink and white stand for Ni, Co, P and H atoms, respectively.

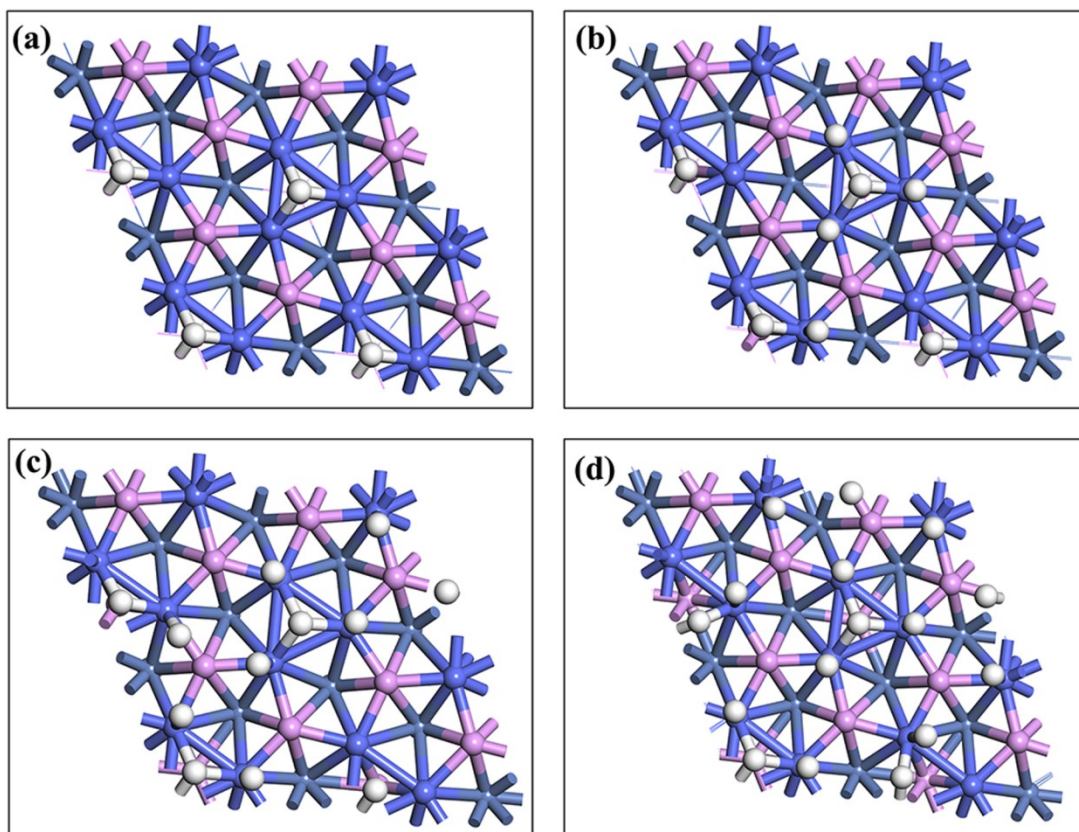

**Figure S7.** Optimized structures of (001)-CoP-t facet at typical hydrogen coverage: (a) 25%, (b) 50% (c) 75% and (d) 100%. Note that the color of gray, blue, pink and white stand for Ni, Co, P and H atoms, respectively.
